# Supplementary material for: A New Exopolysaccharide of Marine Coral-Associated Aspergillus pseudoglaucus SCAU265: Structural Characterization and Immunomodulatory Activity
Source: MDPI journal article supplement (doi:10.3390/jof9111057), 2023-10-27
Supplement: s1 [file s1]

A new exopolysaccharide of marine coral-associated *Aspergillus* sp. SCAU265: Structural  
characterization and immunomodulatory activity

Bo Peng<sup>1†</sup>, Yongchun Liu<sup>2†</sup>, Yuqi Lin<sup>3</sup>, Supaluck Kraithong<sup>3</sup>, Li Mo<sup>2</sup>, Ziqing Gao<sup>2</sup>, Riming Huang<sup>3\*</sup>,

Xiaoyong Zhang<sup>2\*</sup>

<sup>1</sup>Institute for Environmental and Climate Research, Jinan University, Guangzhou, 511443, China

<sup>2</sup>University Joint Laboratory of Guangdong Province, Hong Kong and Macao Region on Marine Bioresource Conservation and Exploitation, college of Marine Sciences, South China Agricultural University, Guangzhou, Guangdong, 510642, China

<sup>3</sup>Guangdong Provincial Key Laboratory of Nutraceuticals and Functional Foods, College of Food Science, South China Agricultural University, Guangzhou 510642, China

<sup>†</sup>These authors contributed equally to this work

\*Correspondence: [huangriming@scau.edu.cn](mailto:huangriming@scau.edu.cn) (R. H.); [zhangxiaoyong@scau.edu.cn](mailto:zhangxiaoyong@scau.edu.cn) (X. Z.)

**Table S1.** Significant differences in metabolites between the ASP-1 treatment group and the control group

| Metabolites                                | Class                                     | VIP    | FC    | p-value  |
|--------------------------------------------|-------------------------------------------|--------|-------|----------|
| L-threo-3-Methylmalate                     | Alcohols and polyols                      | 1.6485 | 8.66  | < 0.0001 |
| IMP                                        | Alcohols and polyols                      | 1.6359 | 2.2   | 0.0001   |
| Phosphohydroxypyruvic acid                 | Alpha-keto acids and derivatives          | 1.4011 | 1.05  | 0.0327   |
| Porphobilinogen                            | Amines                                    | 1.4694 | 0.73  | 0.0014   |
| Citrulline                                 | Amino acids, peptides, and analogues      | 1.5132 | 86.22 | < 0.0001 |
| N-Acetylglutamic acid                      | Amino acids, peptides, and analogues      | 1.6465 | 1.93  | < 0.0001 |
| L-Glutamic acid                            | Amino acids, peptides, and analogues      | 1.6408 | 1.59  | < 0.0001 |
| Dimethylglycine                            | Amino acids, peptides, and analogues      | 1.636  | 1.54  | 0.0001   |
| Asymmetric dimethylarginine                | Amino acids, peptides, and analogues      | 1.4012 | 0.75  | 0.0083   |
| L-Asparagine                               | Amino acids, peptides, and analogues      | 1.5852 | 0.73  | 0.0022   |
| L-Serine                                   | Amino acids, peptides, and analogues      | 1.6091 | 0.72  | 0.0009   |
| L-Aspartic acid                            | Amino acids, peptides, and analogues      | 1.6459 | 0.42  | < 0.0001 |
| Creatinine                                 | Amino acids, peptides, and analogues      | 1.355  | 0.36  | 0.0162   |
| L-Isoleucine                               | Amino acids, peptides, and analogues      | 1.2413 | 0.34  | 0.0465   |
| (2E)-Decenoyl-ACP                          | Amino acids, peptides, and analogues      | 1.4647 | 0.2   | 0.0017   |
| Metoclopramide                             | Aminophenyl ethers                        | 1.2462 | 0.68  | 0.0455   |
| Dehydroepiandrosterone                     | Androstane steroids                       | 1.2769 | 0.09  | 0.0352   |
| Salicylic acid                             | Benzoic acids and derivatives             | 1.5322 | 0.2   | 0.036    |
| Phthalic acid                              | Benzoic acids and derivatives             | 1.3903 | 0.09  | 0.0352   |
| D-Galactose                                | Carbohydrates and carbohydrate conjugates | 1.4425 | 3.83  | 0.0234   |
| trans-1,2-Cyclohexanediol                  | Carbohydrates and carbohydrate conjugates | 1.5167 | 3.37  | 0.0092   |
| N-Acetyl-a-neuraminic acid                 | Carbohydrates and carbohydrate conjugates | 1.5913 | 0.44  | 0.0018   |
| Sorbitol                                   | Carbohydrates and carbohydrate conjugates | 1.2954 | 0.27  | 0.0307   |
| Mannitol                                   | Carbohydrates and carbohydrate conjugates | 1.3061 | 0.23  | 0.0266   |
| Cholesterol                                | Cholestane steroids                       | 1.4685 | 0.02  | 0.0014   |
| Cyclic GMP                                 | Cyclic purine nucleotides                 | 1.2344 | 2.76  | 0.0472   |
| Succinic acid                              | Dicarboxylic acids and derivatives        | 1.6484 | 4.73  | < 0.0001 |
| 19(S)-HETE                                 | Eicosanoids                               | 1.3466 | 1.29  | 0.0475   |
| Propionylcarnitine                         | Fatty acid esters                         | 1.4458 | 0.73  | 0.0031   |
| Itaconic acid                              | Fatty acids and conjugates                | 1.6485 | 21.58 | < 0.0001 |
| Undecanoic acid                            | Fatty acids and conjugates                | 1.3036 | 4.09  | 0.0276   |
| Palmitic acid                              | Fatty acids and conjugates                | 1.3456 | 3.23  | 0.0464   |
| 7,8-Diaminononanoate                       | Fatty acids and conjugates                | 1.5015 | 2.19  | 0.0001   |
| Docosapentaenoic acid (22n-3)              | Fatty acids and conjugates                | 1.5057 | 0.85  | 0.0107   |
| 5-Guanidino-3-methyl-2-oxopentanoate       | Fatty acids and conjugates                | 1.2722 | 0.78  | 0.0365   |
| Palmitoleic acid                           | Fatty acids and conjugates                | 1.3873 | 0.53  | 0.0106   |
| Glycerophosphocholine                      | Glycerophosphocholines                    | 1.4362 | 2.18  | 0.004    |
| Gamma-Linolenic acid                       | Lineolic acids and derivatives            | 1.4481 | 2.55  | 0.003    |
| Oxoadipic acid                             | Medium-chain keto acids and derivatives   | 1.6461 | 4.38  | < 0.0001 |
| 3-Carbamoyl-2-phenylpropionaldehyde        | Phenylacetaldehydes                       | 1.394  | 1.34  | 0.0095   |
| O-Phosphoethanolamine                      | Phosphate esters                          | 1.3125 | 0.34  | 0.0256   |
| Pantothenic acid                           | Polyols                                   | 1.597  | 1.25  | 0.015    |
| Pterin                                     | Pterins and derivatives                   | 1.5008 | 2.61  | 0.0001   |
| 1-Methyladenosine                          | Purine nucleosides                        | 1.5033 | 0.34  | 0.0001   |
| Xanthylic acid                             | Purine ribonucleotides                    | 1.431  | 0.56  | 0.0244   |
| Xanthine                                   | Purines and purine derivatives            | 1.5746 | 0.85  | 0.0031   |
| Pyridoxal 5'-phosphate                     | Pyridine carboxaldehydes                  | 1.4346 | 0.61  | 0.0043   |
| Quinolinic acid                            | Pyridinecarboxylic acids and derivatives  | 1.4899 | 2.63  | 0.0004   |
| Pyridoxine                                 | Pyridoxines                               | 1.3949 | 0.63  | 0.0093   |
| Uridine                                    | Pyrimidine nucleosides                    | 1.6407 | 1.41  | < 0.0001 |
| Uridine diphosphate-N-acetylglucosamine    | Pyrimidine nucleotide sugars              | 1.472  | 0.33  | 0.0173   |
| Cytosine                                   | Pyrimidines and pyrimidine derivatives    | 1.4032 | 1.41  | 0.0079   |
| Cytidine                                   | Pyrimidines and pyrimidine derivatives    | 1.44   | 1.4   | 0.0036   |
| Aprobarbital                               | Pyrimidines and pyrimidine derivatives    | 1.6484 | 0.25  | < 0.0001 |
| L-Carnitine                                | Quaternary ammonium salts                 | 1.4704 | 0.54  | 0.0013   |
| Fumaric acid                               | Short-chain keto acids and derivatives    | 1.6191 | 0.81  | 0.0005   |
| (2R)-2-Hydroxy-3-(phosphonatoxy)propanoate | Sugar acids and derivatives               | 1.5688 | 1.2   | 0.0035   |
| Citric acid                                | Tricarboxylic acids and derivatives       | 1.6378 | 1.92  | 0.0001   |
| Phenyl acetate                             | others                                    | 1.5735 | 0.34  | 0.0029   |
| 2-Deoxystreptamine                         | others                                    | 1.2444 | 0.75  | 0.0442   |
| 2-Acetamidofluorene                        | others                                    | 1.3594 | 0.68  | 0.0155   |
| 2-Iminobutanoate                           | others                                    | 1.2298 | 0.67  | 0.049    |
| NAD                                        | others                                    | 1.3246 | 0.3   | 0.0226   |

VIP: Variable importance in projection, FC: Fold Change

**Table S2.** Up- or down-regulated metabolites in the top 20 enrichment pathways (The ones marked in red are amino acids)

| Pathway (Top 20 enrichment)                                                 | Up metabolites                                                                                                                                                              | Down metabolites                                                                                                                    |
|-----------------------------------------------------------------------------|-----------------------------------------------------------------------------------------------------------------------------------------------------------------------------|-------------------------------------------------------------------------------------------------------------------------------------|
| Central carbon metabolism in cancer                                         | <b>L-Glutamic acid</b> ; Succinic acid; <b>L-Aspartic acid</b> ;<br><b>L-Serine</b>                                                                                         | Fumaric acid; <b>L-Asparagine</b> ; Citric acid;<br>(2R)-2-Hydroxy-3-(phosphonatoxy)propanoate; <b>L-Isoleucine</b>                 |
| Biosynthesis of plant secondary metabolites                                 | <b>L-Glutamic acid</b> ; Succinic acid; <b>L-Aspartic acid</b> ;<br><b>L-Serine</b> ; Fumaric acid; IMP; <b>L-Asparagine</b> acid                                           | Citric acid; (2R)-2-Hydroxy-3-(phosphonatoxy) propanoate;<br>Palmitic acid; Xanthine; L-Isoleucine; Xanthylic acid; Quinolinic acid |
| Biosynthesis of alkaloids derived from histidine and purine                 | Succinic acid; Fumaric acid; IMP; Citric acid                                                                                                                               | (2R)-2-Hydroxy-3-(phosphonatoxy)propanoate; Xanthine;<br>Xanthylic acid                                                             |
| Biosynthesis of amino acids                                                 | <b>L-Glutamic acid</b> ; <b>L-Aspartic acid</b> ; <b>L-Serine</b> ;<br><b>L-Asparagine</b> ; Citric acid;<br>(2R)-2-Hydroxy-3-(phosphonatoxy) propanoate;<br>Oxoadipic acid | <b>Citrulline</b> ; <b>L-Isoleucine</b> ; N-Acetylglutamic acid;<br>Phosphohydroxypyruvic acid                                      |
| Alanine, aspartate and glutamate metabolism                                 | <b>L-Glutamic acid</b> ; Succinic acid; <b>L-Aspartic acid</b>                                                                                                              | Fumaric acid; <b>L-Asparagine</b> ; Citric acid                                                                                     |
| Biosynthesis of alkaloids derived from ornithine, lysine and nicotinic acid | <b>L-Glutamic acid</b> ; Succinic acid; <b>L-Aspartic acid</b> ;<br>Fumaric acid; Citric acid                                                                               | (2R)-2-Hydroxy-3-(phosphonatoxy) propanoate; <b>L-Isoleucine</b> ;<br>Quinolinic acid                                               |
| Arginine biosynthesis                                                       | <b>L-Glutamic acid</b> ; <b>L-Aspartic acid</b> ; Fumaric acid                                                                                                              | <b>Citrulline</b> ; N-Acetylglutamic acid                                                                                           |
| Biosynthesis of cofactors                                                   | NAD; Pyridoxal 5'-phosphate; <b>L-Glutamic acid</b> ;<br><b>L-Aspartic acid</b> ; <b>L-Serine</b> ; IMP; Citric acid;<br>(2R)-2-Hydroxy-3-(phosphonatoxy) propanoate        | Pyridoxine; Oxoadipic acid; Pantothenic acid; Porphobilinogen;<br>7,8-Diaminononanoate; Quinolinic acid                             |
| Biosynthesis of plant hormones                                              | Succinic acid; <b>L-Aspartic acid</b> ; Fumaric acid; IMP                                                                                                                   | Citric acid; (2R)-2-Hydroxy-3-(phosphonatoxy)propanoate;<br>Salicylic acid                                                          |
| ABC transporters                                                            | <b>L-Glutamic acid</b> ; <b>L-Aspartic acid</b> ; <b>L-Serine</b>                                                                                                           | Uridine; Mannitol; <b>L-Isoleucine</b> ; Cytidine; Sorbitol; Phthalic acid                                                          |
| Carbon metabolism                                                           | <b>L-Glutamic acid</b> ; Succinic acid; <b>L-Aspartic acid</b> ;<br><b>L-Serine</b> ; Fumaric acid                                                                          | Citric acid; (2R)-2-Hydroxy-3-(phosphonatoxy) propanoate;<br>Phosphohydroxypyruvic acid                                             |
| Biosynthesis of various secondary metabolites - part 3                      | <b>L-Glutamic acid</b> ; <b>L-Aspartic acid</b> ; <b>L-Serine</b> ; Citric acid                                                                                             | (2R)-2-Hydroxy-3-(phosphonatoxy) propanoate; <b>Citrulline</b>                                                                      |
| Protein digestion and absorption                                            | <b>L-Glutamic acid</b>                                                                                                                                                      | <b>L-Aspartic acid</b> ; <b>L-Serine</b> ; <b>L-Asparagine</b> ; <b>L-Isoleucine</b>                                                |
| Biosynthesis of alkaloids derived from terpenoid and polyketide             | Succinic acid; Fumaric acid; Citric acid                                                                                                                                    | Cholesterol; (2R)-2-Hydroxy-3-(phosphonatoxy) propanoate                                                                            |
| Glucagon signaling pathway                                                  | Succinic acid; Fumaric acid; Citric acid                                                                                                                                    | (2R)-2-Hydroxy-3-(phosphonatoxy) propanoate                                                                                         |
| Glycine, serine and threonine metabolism                                    | <b>L-Aspartic acid</b> ; <b>L-Serine</b> ;<br>(2R)-2-Hydroxy-3-(phosphonatoxy) propanoate;<br>Dimethylglycine; Phosphohydroxypyruvic acid                                   | Dimethylglycine; Phosphohydroxypyruvic acid                                                                                         |
| Aminoacyl-tRNA biosynthesis                                                 | <b>L-Glutamic acid</b>                                                                                                                                                      | <b>L-Aspartic acid</b> ; <b>L-Serine</b> ; <b>L-Asparagine</b> ; <b>L-Isoleucine</b>                                                |
| Two-component system                                                        | <b>L-Glutamic acid</b> ; Succinic acid; <b>L-Aspartic acid</b>                                                                                                              | Fumaric acid; Citric acid                                                                                                           |
| Mineral absorption                                                          | <b>L-Serine</b>                                                                                                                                                             | D-Galactose; <b>L-Asparagine</b> ; <b>L-Isoleucine</b>                                                                              |
| Nicotinate and nicotinamide metabolism                                      | NAD; Succinic acid                                                                                                                                                          | <b>L-Aspartic acid</b> ; Fumaric acid; Quinolinic acid                                                                              |

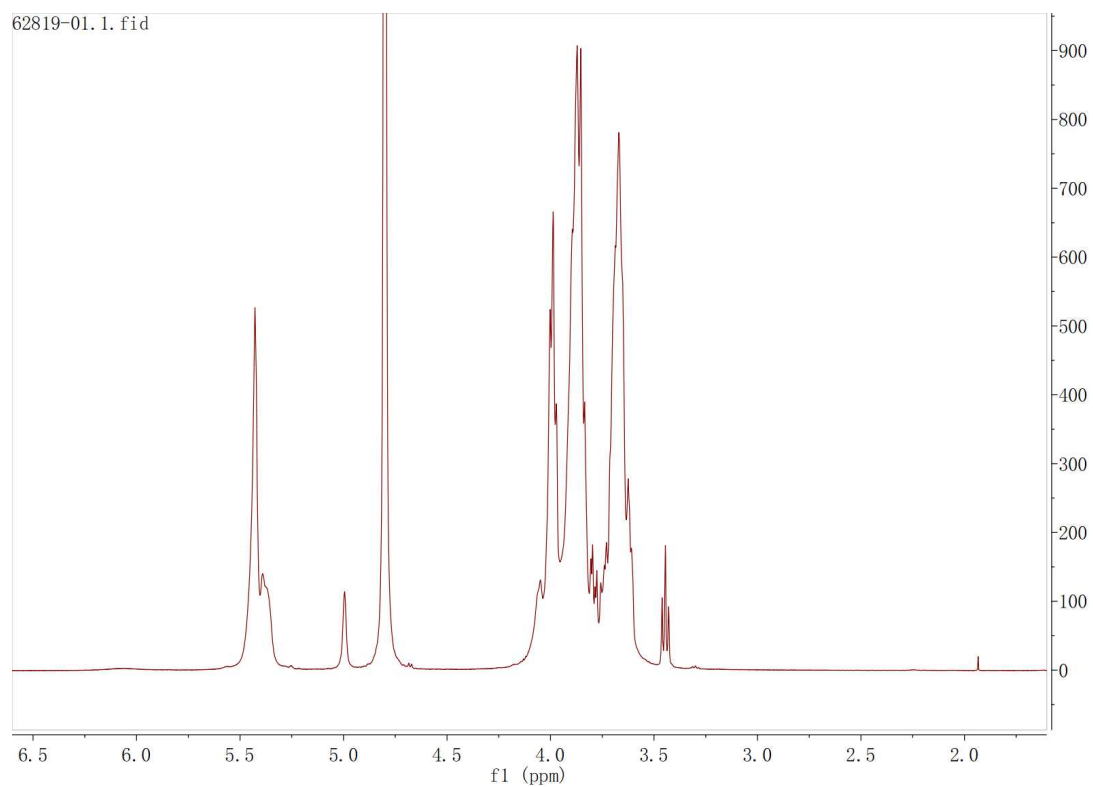

**Figure S1.** The original image (data) of  $^1\text{H}$  NMR of ASP-1

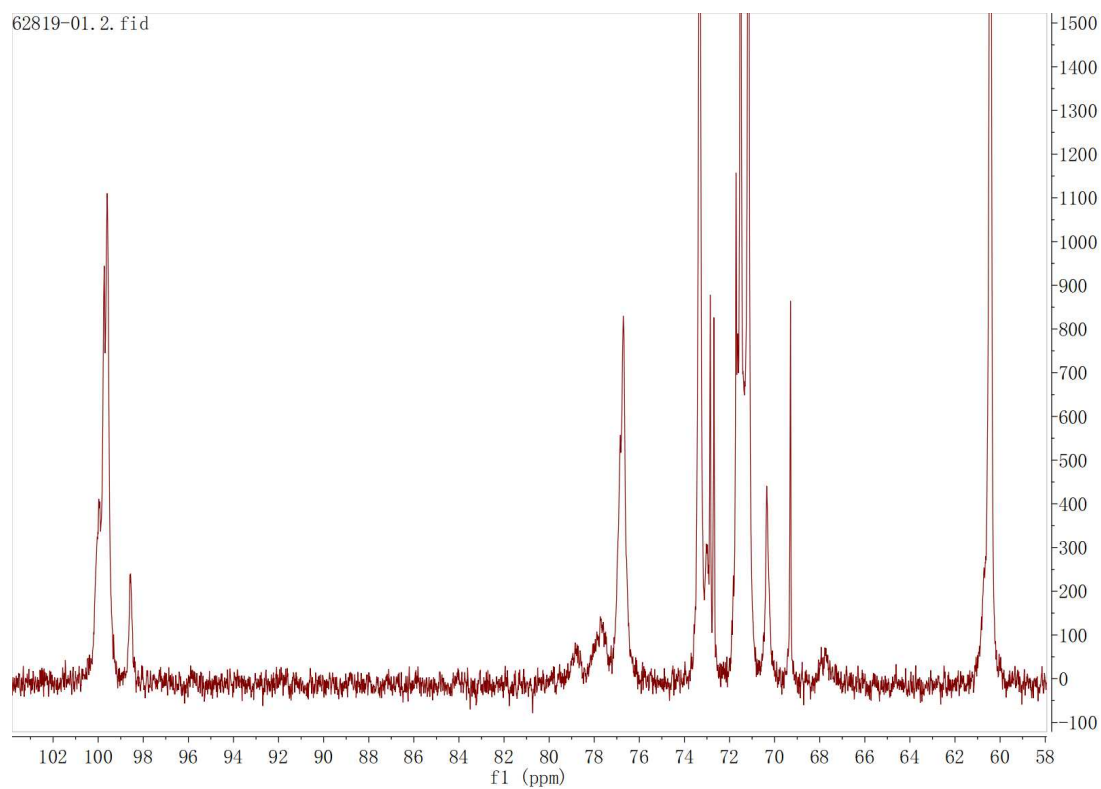

**Figure S2.** The original image (data) of  $^{13}\text{C}$  NMR of ASP-1

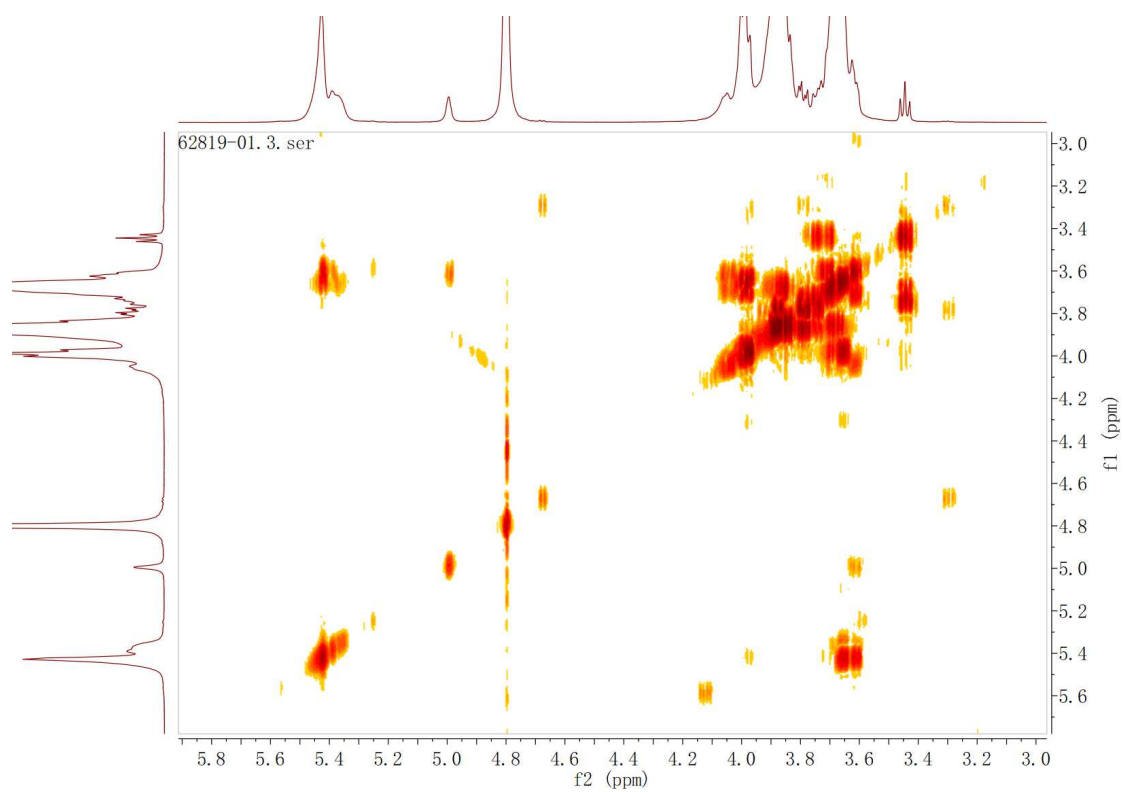

**Figure S3.** The original image (data) of  $^1\text{H}$ - $^1\text{H}$  COSY of ASP-1

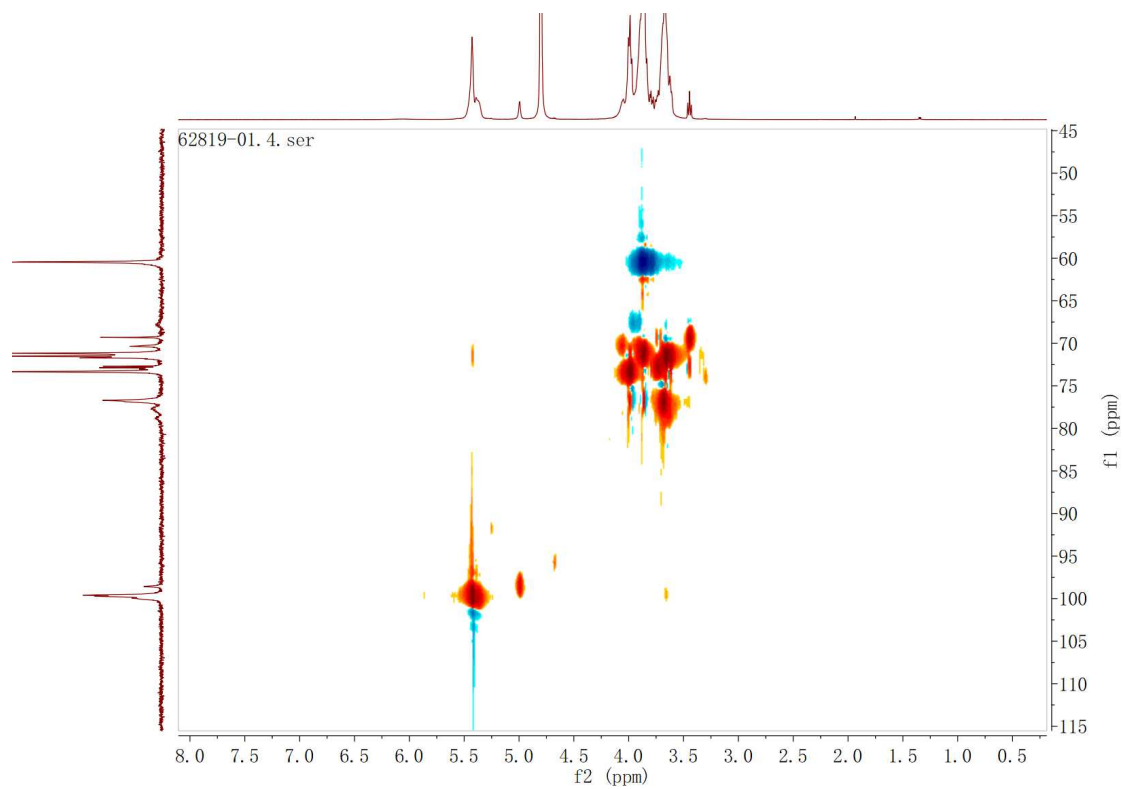

**Figure S4.** The original image (data) of HSQC of ASP-1

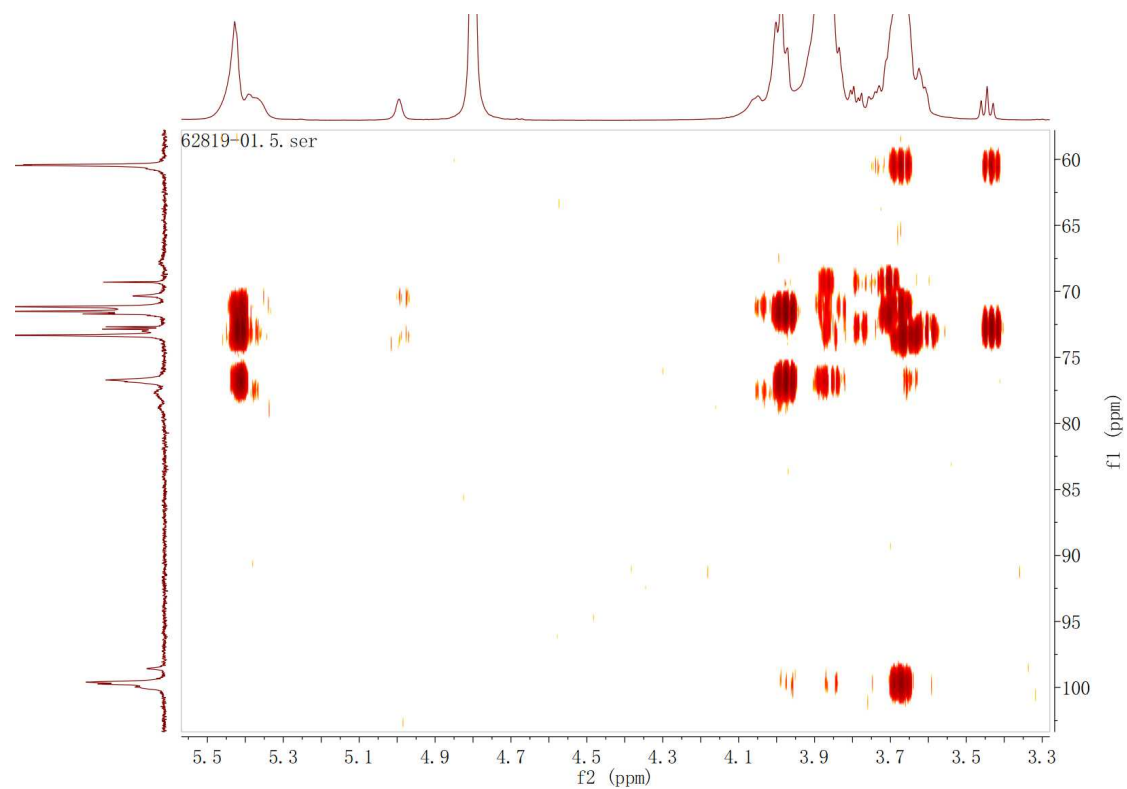

**Figure S5.** The original image (data) of HMBC of ASP-1

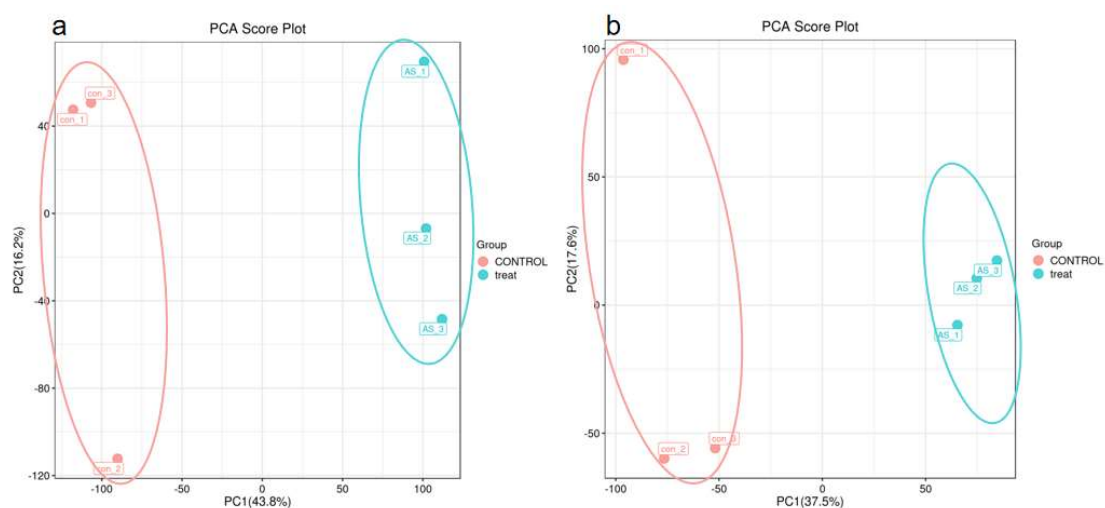

**Figure S6.** Principal Component Analysis (PCA) score plot of the macrophage RAW 264.7 cell samples from ASP-1 treatment and control groups in positive (a) and negative (b) ion modes. Con\_1, 2 and 3 represent three parallel control samples, and AS\_1, 2 and 3 represent three parallel treated samples with ASP-1.

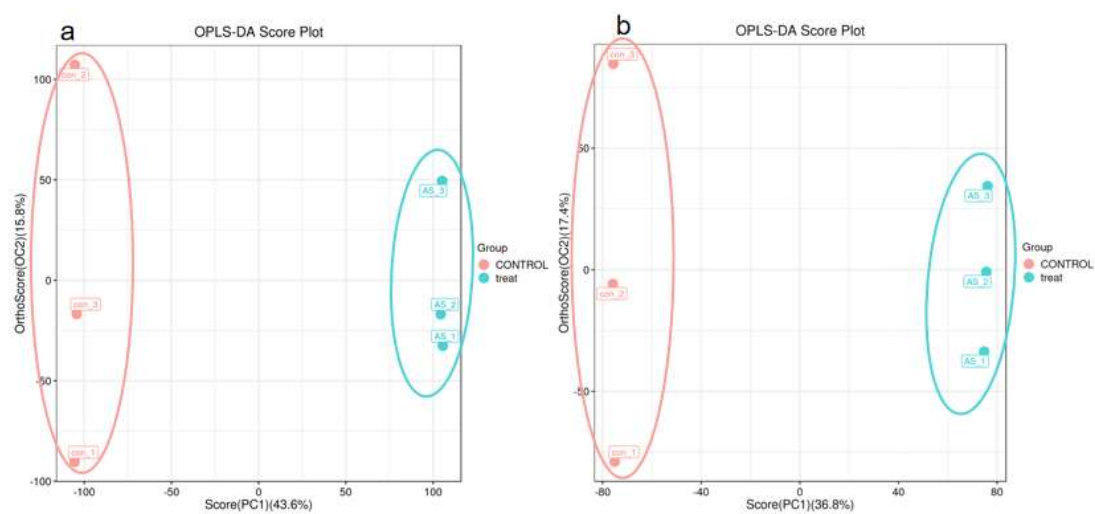

**Figure S7.** Orthogonal partial least-squares discriminant analysis (OPLS-DA) score plot of the macrophage RAW 264.7 cell samples from ASP-1 treatment and control groups in positive (a) and negative (b) ion modes. Con\_1, 2 and 3 represent three parallel control samples, and AS\_1, 2 and 3 represent three parallel treated samples with ASP-1.
